# Supplementary material for: A nanoplatform with tumor-targeted aggregation and drug-specific release characteristics for photodynamic/photothermal combined antitumor therapy under near-infrared laser irradiation
Source: Royal Society of Chemistry journal article supplement (doi:10.1039/d0nr00123f), 2020-01-01
Supplement: d0nr00123f1.pdf [file d0nr00123f1.pdf]

## Nanoplatfom with tumor-targeted aggregation and drug-specific release characteristics for photodynamic/photothermal combined anti-tumor therapy under near-infrared laser irradiation

Mingran Xie,<sup>a#</sup> Yongfu Zhu,<sup>b#</sup> Shibin Xu,<sup>a</sup> Guangwen Xu,<sup>a</sup> Ran Xiong,<sup>a</sup> Xiaohui Sun,<sup>a</sup> Changqing Liu<sup>a</sup>

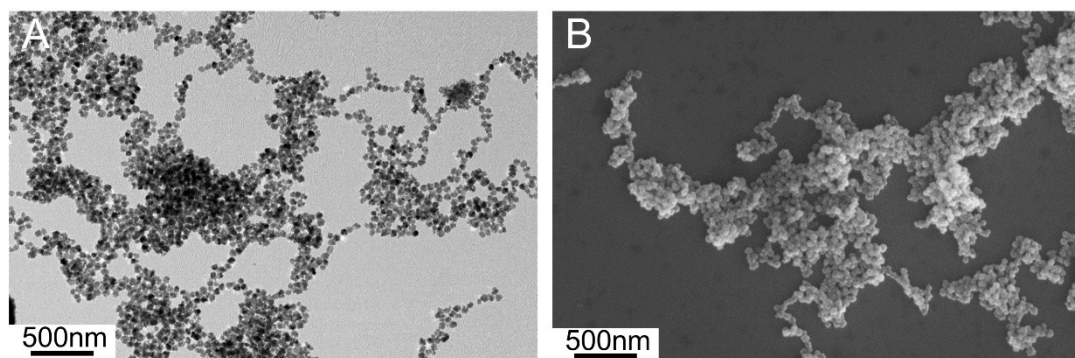

S Figure 1. Characterization of the nanoprobes. (A) TEM and (B) SEM images of the nanoprobes

| Name | Weight % | Atomic % |
|------|----------|----------|
| C    | 3.41     | 8.57     |
| O    | 29.20    | 54.99    |
| Ca   | 0.38     | 0.29     |
| Fe   | 67.01    | 36.16    |

S Figure 2. Element analysis based on SEM.

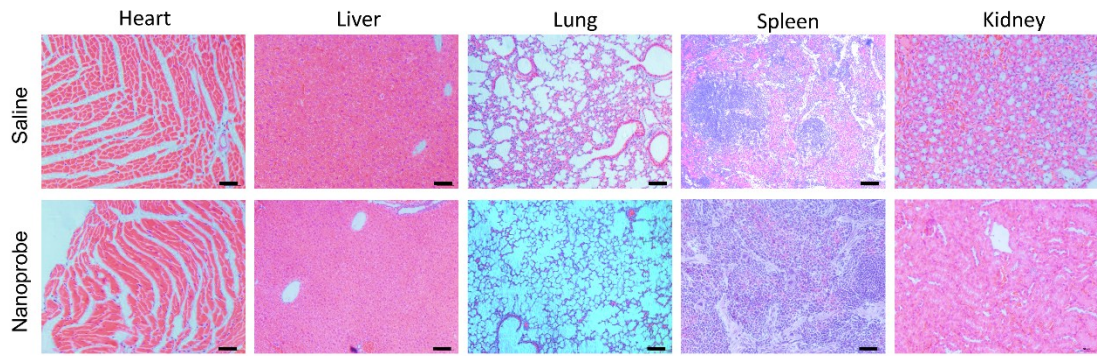

S Figure 3. H&E images of the main organs from saline and nanoprobe groups.

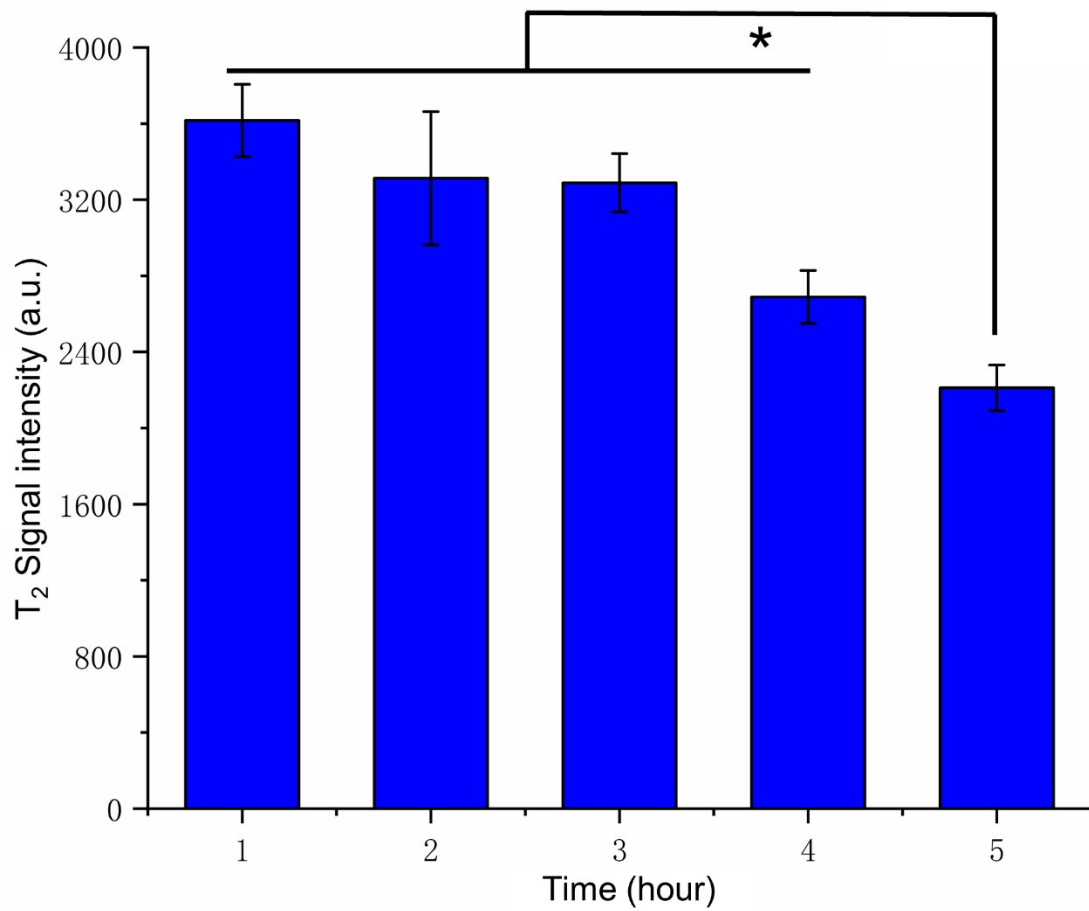

S Figure 4. T<sub>2</sub>-MR signals from tumor region after i.v. injection with the nanoprobes at the different time-points.
